# Supplementary material for: Multi-Stage Network for Event-Based Video Deblurring with Residual Hint Attention
Source: MDPI journal article supplement (doi:10.3390/s23062880), 2023-03-07
Supplement: s1 [file s1]

# Supplementary Materials: Multi-Stage Network for Event-Based Video Deblurring with Residual Hint Attention

Jeong Min Kim  and Yong Ju Jung\*

## 1. Supplementary details

This supplementary material is accompanied by the manuscript "Multi-stage network for event-based video deblurring with residual hint attention" and contains the network architectures and additional visual results.

Table S1 shows the network architecture of the coarse network. Table S2 shows the structure of the dynamic filter estimation. Table S3 shows the structure of the gate fusion module. Table S4 shows the structure of the residual hint attention (RHA) module. Table S5 shows how the inputs of the refinement network are generated. Table S6 shows the network architecture of the refinement network.

Figure S1 shows additional results of visual comparison with the GoPro dataset [1].

## References

1. Nah, S.; Kim, T.H.; Lee, K.M. Deep multi-scale convolutional neural network for dynamic scene deblurring. In Proceedings of the IEEE Conference on Computer Vision and Pattern Recognition, 2017, pp. 3883–3891.
2. Lin, S.; Zhang, J.; Pan, J.; Jiang, Z.; Zou, D.; Wang, Y.; Chen, J.; Ren, J. Learning event-driven video deblurring and interpolation. In Proceedings of the European Conference on Computer Vision. Springer, 2020, pp. 695–710.
3. Zhou, S.; Zhang, J.; Pan, J.; Xie, H.; Zuo, W.; Ren, J. Spatio-temporal filter adaptive network for video deblurring. In Proceedings of the IEEE/CVF International Conference on Computer Vision, 2019, pp. 2482–2491.
4. Rebecq, H.; Ranftl, R.; Koltun, V.; Scaramuzza, D. High speed and high dynamic range video with an event camera. *IEEE Transactions on Pattern Analysis and Machine Intelligence* **2019**, *43*, 1964–1980.
5. Pan, J.; Bai, H.; Tang, J. Cascaded deep video deblurring using temporal sharpness prior. In Proceedings of the IEEE Conference on Computer Vision and Pattern Recognition, 2020, pp. 3043–3051.
6. Zhong, Z.; Gao, Y.; Zheng, Y.; Zheng, B. Efficient spatio-temporal recurrent neural network for video deblurring. In Proceedings of the European Conference on Computer Vision. Springer, 2020, pp. 191–207.
7. Shang, W.; Ren, D.; Zou, D.; Ren, J.S.; Luo, P.; Zuo, W. Bringing events into video deblurring with non-consecutively blurry frames. In Proceedings of the IEEE/CVF International Conference on Computer Vision, 2021, pp. 4531–4540.

**Table S1.** Structure of the coarse network [2].

| Inputs/Branches                                                      | Operation                                            | Kernel Size  | Stride | Channel | Output                 | Activation |
|----------------------------------------------------------------------|------------------------------------------------------|--------------|--------|---------|------------------------|------------|
| Input                                                                | Concatenation( $C_{i-1}, C_i$ )                      |              |        |         |                        |            |
| E_encoder1                                                           | Convolution                                          | $3 \times 3$ | 1      | 64      | e_feature1             | LeakyReLU  |
| E_resblock1_1                                                        | Residual block                                       | $3 \times 3$ | 1      | 64      | e_feature2             | LeakyReLU  |
| E_resblock1_2                                                        | Residual block                                       | $3 \times 3$ | 1      | 64      | e_feature3             | LeakyReLU  |
| E_encoder2                                                           | Convolution                                          | $3 \times 3$ | 2      | 96      | e_feature4             | LeakyReLU  |
| E_resblock2_1                                                        | Residual block                                       | $3 \times 3$ | 1      | 96      | e_feature5             | LeakyReLU  |
| E_resblock2_2                                                        | Residual block                                       | $3 \times 3$ | 1      | 96      | e_feature6             | LeakyReLU  |
| E_encoder3                                                           | Convolution                                          | $3 \times 3$ | 2      | 128     | e_feature7             | LeakyReLU  |
| E_resblock3_1                                                        | Residual block                                       | $3 \times 3$ | 1      | 128     | e_feature8             | LeakyReLU  |
| E_resblock3_2                                                        | Residual block                                       | $3 \times 3$ | 1      | 128     | e_feature9             | LeakyReLU  |
| kconv                                                                | kconv(e_feature9, Dynamic Filter), 128channel        |              |        |         |                        |            |
| E_decoder1                                                           | ConvTranspose                                        | $4 \times 4$ | 2      | 96      | e_feature10            | LeakyReLU  |
| Skip connection                                                      | Concatenation(e_feature10, e_feature6)               |              |        |         |                        |            |
| E_skipConv1                                                          | Convolution                                          | $3 \times 3$ | 1      | 96      | e_feature11            | LeakyReLU  |
| E_resblock4_1                                                        | Residual block                                       | $3 \times 3$ | 1      | 96      | e_feature12            | LeakyReLU  |
| E_resblock4_2                                                        | Residual block                                       | $3 \times 3$ | 1      | 96      | e_feature13            | LeakyReLU  |
| E_decoder2                                                           | ConvTranspose                                        | $4 \times 4$ | 2      | 64      | e_feature14            | LeakyReLU  |
| Skip connection                                                      | Concatenation(e_feature13, e_feature3)               |              |        |         |                        |            |
| E_skipConv2                                                          | Convolution                                          | $3 \times 3$ | 1      | 96      | event feature( $E_i$ ) | LeakyReLU  |
| residual_estimation_for_blurry_frame                                 | event feature( $E_i$ )                               |              |        |         |                        |            |
| E_residual_conv_b1                                                   | Convolution                                          | $3 \times 3$ | 1      | 32      | r_b_feature1           | LeakyReLU  |
| E_residual_resblock_b1                                               | Residual block                                       | $3 \times 3$ | 1      | 32      | r_b_feature2           | LeakyReLU  |
| E_residual_resblock_b2                                               | Residual block                                       | $3 \times 3$ | 1      | 32      | r_b_feature3           | LeakyReLU  |
| E_residual_conv_b2                                                   | Convolution                                          | $3 \times 3$ | 1      | 3       | intensity_residual_b   | LeakyReLU  |
| $(B_i * \text{intensity\_residual\_b} = LS_i^{(b)})$                 |                                                      |              |        |         |                        |            |
| residual_estimation_for_previous_frame                               | event feature( $E_i$ )                               |              |        |         |                        |            |
| E_residual_conv_s1                                                   | Convolution                                          | $3 \times 3$ | 1      | 32      | r_s_feature1           | LeakyReLU  |
| E_residual_resblock_s1                                               | Residual block                                       | $3 \times 3$ | 1      | 32      | r_s_feature2           | LeakyReLU  |
| E_residual_resblock_s2                                               | Residual block                                       | $3 \times 3$ | 1      | 32      | r_s_feature3           | LeakyReLU  |
| E_residual_conv_s2                                                   | Convolution                                          | $3 \times 3$ | 1      | 3       | intensity_residual_s   | LeakyReLU  |
| $(S_{i-1} * \text{intensity\_residual\_s} = LS_i^{(s)})$             |                                                      |              |        |         |                        |            |
| Gate_fusion                                                          | $(C_i, C_{i-1}, LS_i^{(b)}, LS_i^{(s)}, PS_i^{(2)})$ |              |        |         |                        |            |
| $(CS_i = \text{weight1} * LS_i^{(b)} + \text{weight2} * LS_i^{(s)})$ |                                                      |              |        |         |                        |            |
| Output                                                               | coarse sharp frame ( $CS_i$ )                        |              |        |         |                        |            |

**Table S2.** Structure of the dynamic filter generation block used for the event feature extraction [2,3].

| Inputs/Branches | Operation                                              | Kernel Size  | Stride | Channel                 | Output         | Activation |
|-----------------|--------------------------------------------------------|--------------|--------|-------------------------|----------------|------------|
| Input           | Concatenation( $C_{i-1}, C_i, B_{i-1}, B_i, S_{i-1}$ ) |              |        |                         |                |            |
| F_encoder1      | Convolution                                            | $3 \times 3$ | 1      | 64                      | f_feature1     | LeakyReLU  |
| F_resblock1_1   | Residual block                                         | $3 \times 3$ | 1      | 64                      | f_feature2     | LeakyReLU  |
| F_resblock1_2   | Residual block                                         | $3 \times 3$ | 1      | 64                      | f_feature3     | LeakyReLU  |
| F_encoder2      | Convolution                                            | $3 \times 3$ | 2      | 96                      | f_feature4     | LeakyReLU  |
| F_resblock2_1   | Residual block                                         | $3 \times 3$ | 1      | 96                      | f_feature5     | LeakyReLU  |
| F_resblock2_2   | Residual block                                         | $3 \times 3$ | 1      | 96                      | f_feature6     | LeakyReLU  |
| F_encoder3      | Convolution                                            | $3 \times 3$ | 2      | 128                     | f_feature7     | LeakyReLU  |
| F_resblock3_1   | Residual block                                         | $3 \times 3$ | 1      | 128                     | f_feature8     | LeakyReLU  |
| F_resblock3_2   | Residual block                                         | $3 \times 3$ | 1      | 128                     | f_feature9     | LeakyReLU  |
| FAC_conv1       | Convolution                                            | $3 \times 3$ | 1      | 128                     | f_feature10    | LeakyReLU  |
| F_resblock4_1   | Residual block                                         | $3 \times 3$ | 1      | 128                     | f_feature11    | LeakyReLU  |
| F_resblock4_2   | Residual block                                         | $3 \times 3$ | 1      | 128                     | f_feature12    | LeakyReLU  |
| FAC_conv2       | Convolution                                            | $3 \times 3$ | 1      | $128 \times K \times K$ | Dynamic Filter | LeakyReLU  |
| Output          | Dynamic Filter ( $128 \times K \times K$ )             |              |        |                         |                |            |

**Table S3.** Structure of the gate fusion module

| Inputs/Branches | Operation                                                                                                              | Kernel Size  | Stride | Channel | Output        | Activation |
|-----------------|------------------------------------------------------------------------------------------------------------------------|--------------|--------|---------|---------------|------------|
| Input           | $C_i, C_{i-1}, S_{i-1}, LS_i^{(b)}, LS_i^{(s)}$                                                                        |              |        |         |               |            |
| Reshape         | reshape each input.                                                                                                    |              |        |         |               |            |
| Input           | Concatenation(reshape( $C_i, C_{i-1}, S_{i-1}, fPS_i^{(1)}, PS_i^{(2)}$ )))                                            |              |        |         |               |            |
| G_conv3d1       | Convolution 3D                                                                                                         | $3 \times 3$ | 1      | 64      | gate_feature1 | LeakyReLU  |
| G_conv3d2       | Convolution 3D                                                                                                         | $3 \times 3$ | 1      | 64      | gate_feature2 | LeakyReLU  |
| G_conv3d3       | Convolution 3D                                                                                                         | $3 \times 3$ | 1      | 6       | weight        | sigmoid    |
| Split           | split weight to 3 channel $\text{weight1} = \text{weight}[:, 3, \dots], \text{weight2} = \text{weight}[:, 3 :, \dots]$ |              |        |         |               |            |
| Output          | Two channel weight map ( $\text{weight1}, \text{weight2}$ )                                                            |              |        |         |               |            |

**Table S4.** Structure of the residual hint attention (RHA) module

| Inputs/Branches | Operation   | Kernel Size  | Stride | Channel                                                                  | Output          | Activation |
|-----------------|-------------|--------------|--------|--------------------------------------------------------------------------|-----------------|------------|
| Input           |             |              |        | $(CS_i, \text{frame})$                                                   |                 |            |
| A_att_conv      | Convolution | $3 \times 3$ | 1      | 32                                                                       | attention_map   | sigmoid    |
| Input           |             |              |        | (frame)                                                                  |                 |            |
| A_content_conv  | Convolution | $3 \times 3$ | 1      | 32                                                                       | content_feature | LeakyReLU  |
| Input           |             |              |        | (frame)                                                                  |                 |            |
| A_ref_conv      | Convolution | $3 \times 3$ | 1      | 32                                                                       | ref_feature     | LeakyReLU  |
|                 |             |              |        | $\text{Attended\_feature} = \text{attention\_map} * \text{ref\_feature}$ |                 |            |
| Output          |             |              |        | $(\text{Attended\_feature} + \text{content\_feature})$                   |                 |            |

**Table S5.** Generation of the input data for the refinement network

| Inputs/Branches | Operation               | Kernel Size  | Stride | Channel                | Output                                                                                 | Activation |
|-----------------|-------------------------|--------------|--------|------------------------|----------------------------------------------------------------------------------------|------------|
| Input           |                         |              |        | $(CS_i, B_i, S_{i-1})$ |                                                                                        |            |
| Input           |                         |              |        | $(CS_i)$               |                                                                                        |            |
| I_conv1         | Convolution             | $3 \times 3$ | 1      | 32                     | coarse_feature                                                                         | ReLU       |
| Input           |                         |              |        | $(S_{i-1})$            |                                                                                        |            |
| RHA_prev        | Residual hint attention |              |        |                        | attended_feature_S                                                                     |            |
| Input           |                         |              |        | $(B_i)$                |                                                                                        |            |
| RHA_blur        | Residual hint attention |              |        |                        | attended_feature_B                                                                     |            |
| Output          |                         |              |        |                        | $(\text{coarse\_feature} + \text{attended\_feature\_S} + \text{attended\_feature\_B})$ |            |

**Table S6.** Structure of the refinement network

| Inputs/Branches | Operation      | Kernel Size  | Stride | Channel                                     | Output               | Activation |
|-----------------|----------------|--------------|--------|---------------------------------------------|----------------------|------------|
| Input           |                |              |        | (Feature(32 channel))                       |                      |            |
| Input           |                |              |        | $(CS_i)$                                    |                      |            |
| R_conv1_1       | Convolution    | $3 \times 3$ | 1      | 64                                          | r_feature1           | ReLU       |
| R_conv1_2       | Convolution    | $3 \times 3$ | 1      | 64                                          | r_feature2           | ReLU       |
| R_conv1_3       | Convolution    | $3 \times 3$ | 2      | 128                                         | r_feature3           | ReLU       |
| R_conv2_1       | Convolution    | $3 \times 3$ | 1      | 128                                         | r_feature4           | ReLU       |
| R_conv2_2       | Convolution    | $3 \times 3$ | 1      | 128                                         | r_feature5           | ReLU       |
| R_conv2_3       | Convolution    | $3 \times 3$ | 2      | 256                                         | r_feature6           | ReLU       |
| R_conv3_1       | Convolution    | $3 \times 3$ | 1      | 256                                         | r_feature7           | ReLU       |
| R_conv3_2       | Convolution    | $3 \times 3$ | 1      | 256                                         | r_feature8           | ReLU       |
| R_conv3_3       | Convolution    | $3 \times 3$ | 2      | 512                                         | r_feature9           | ReLU       |
| R_resblock_1    | Residual block | $3 \times 3$ | 1      | 512                                         | r_feature10          | ReLU       |
| R_resblock_2    | Residual block | $3 \times 3$ | 1      | 512                                         | r_feature11          | ReLU       |
| Skip_connection |                |              |        | $(\text{r\_feature11}, \text{r\_feature9})$ |                      |            |
|                 |                |              |        | Bilinear interpolation $\times 2$           |                      |            |
| R_conv4_1       | Convolution    | $3 \times 3$ | 1      | 256                                         | r_feature12          | ReLU       |
| R_conv4_2       | Convolution    | $3 \times 3$ | 1      | 256                                         | r_feature13          | ReLU       |
| Skip_connection |                |              |        | $(\text{r\_feature13}, \text{r\_feature6})$ |                      |            |
|                 |                |              |        | Bilinear interpolation $\times 2$           |                      |            |
| R_conv5_1       | Convolution    | $3 \times 3$ | 1      | 128                                         | r_feature14          | ReLU       |
| R_conv5_2       | Convolution    | $3 \times 3$ | 1      | 128                                         | r_feature15          | ReLU       |
| Skip_connection |                |              |        | $(\text{r\_feature15}, \text{r\_feature3})$ |                      |            |
|                 |                |              |        | Bilinear interpolation $\times 2$           |                      |            |
| R_conv6_1       | Convolution    | $3 \times 3$ | 1      | 64                                          | r_feature16          | ReLU       |
| R_conv6_2       | Convolution    | $3 \times 3$ | 1      | 64                                          | r_feature17          | ReLU       |
| R_out_conv      | Convolution    | $3 \times 3$ | 1      | 3                                           | output_of_refinement |            |
| Output          |                |              |        | output_of_refinement                        |                      |            |

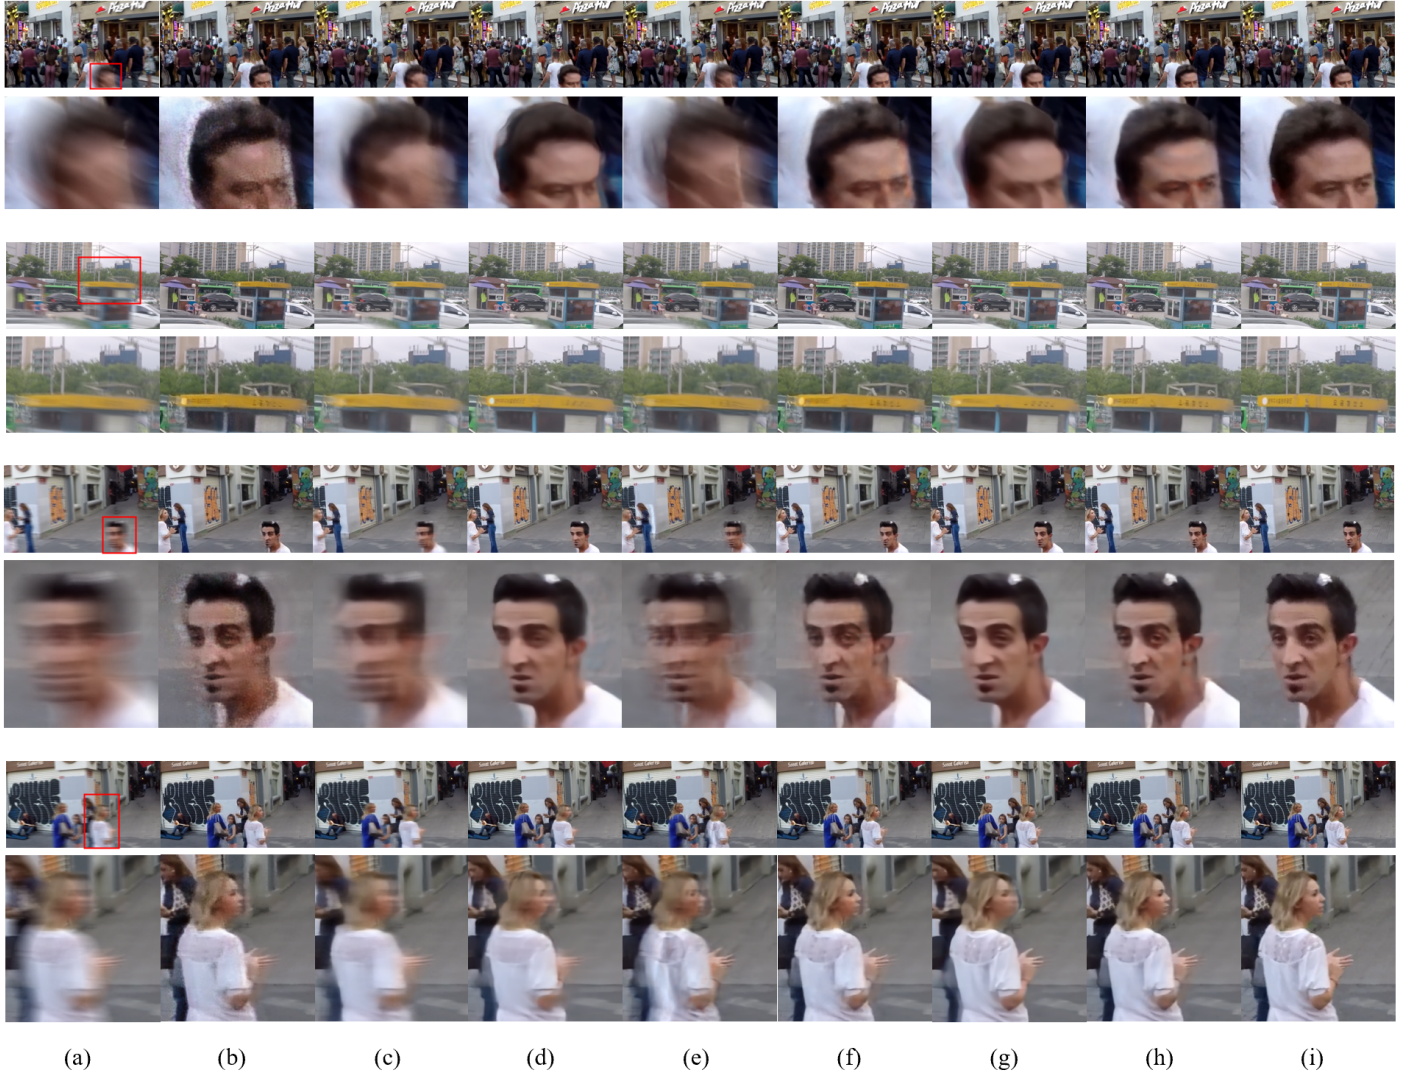

**Figure S1.** Additional visual comparison of video deblurring. (a) Blurry frame (b) Results of E2VID [4]. (c) Results of STFAN [3]. (d) Results of CDVD-TSP [5]. (e) Results of ESTRNN [6]. (f) Results of LEDVDI [2]. (g) Results of  $D^2$ Net [7]. (h) Results of the proposed MEVDNet. (i) Ground truth
